# Supplementary material
Source: PubMed Central journal article supplement (PMC5370421)
Supplement: JB.00859-16_zjb999094367s1.pdf [file JB.00859-16_zjb999094367s1.pdf]

**Supplementary Figure** for

The role of cyclic di-GMP and exopolysaccharide  
in type IV pilus dynamics

Jan Ribbe, Amy E. Baker, Sebastian Euler, George A. O'Toole, Berenike Maier

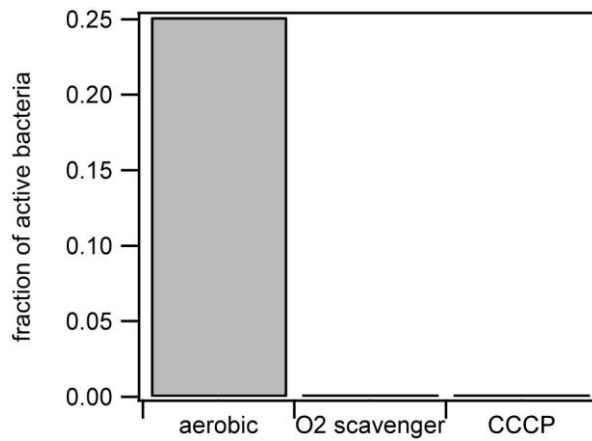

**Fig. S1 Oxygen availability and/or electron transport chain function impacts T4P retraction.** The fraction of cells that showed active T4P retraction when a bead was placed in close proximity to the poles of a bacteria was determined when the medium was saturated with oxygen, when the oxygen was depleted using PCA and PCD, and in the presence of 50  $\mu$ M CCCP.  $N > 46$  bacteria were tested for each condition. In these experiments, the *P. aeruginosa* PA14  $\Delta$ *flgK* mutant was used to eliminate any contribution of the flagellum to the adhesion or movement of the cell.
